# Supplementary material for: Analysis of transcriptional response to heat stress in Rhazya stricta
Source: PubMed Central journal article supplement (PMC5109689; doi:10.1186/s12870-016-0938-6), 2016-11-14

subcluster\_10\_log2\_medianCentered\_fpkm.matrix, 61 tra

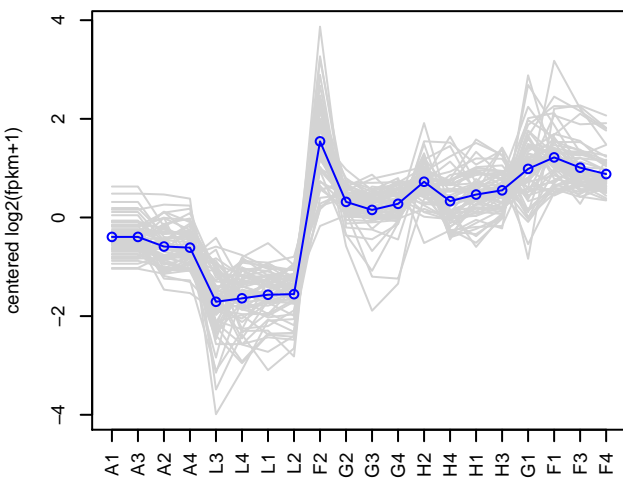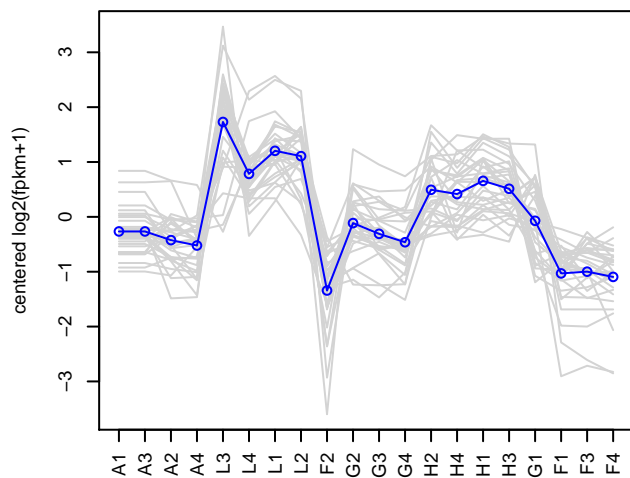

subcluster\_12\_log2\_medianCentered\_fpkm.matrix, 158 tra

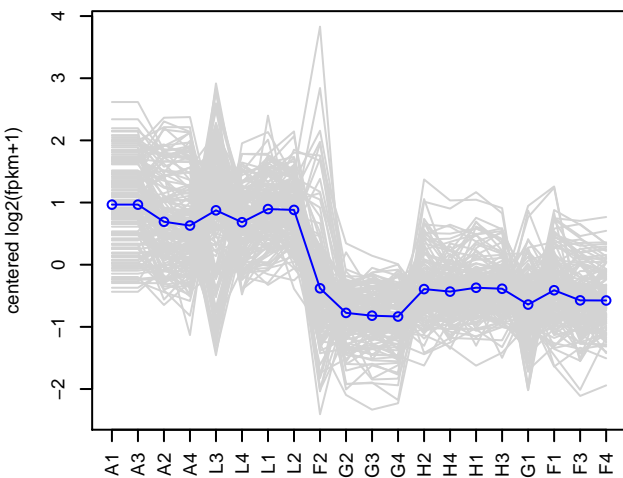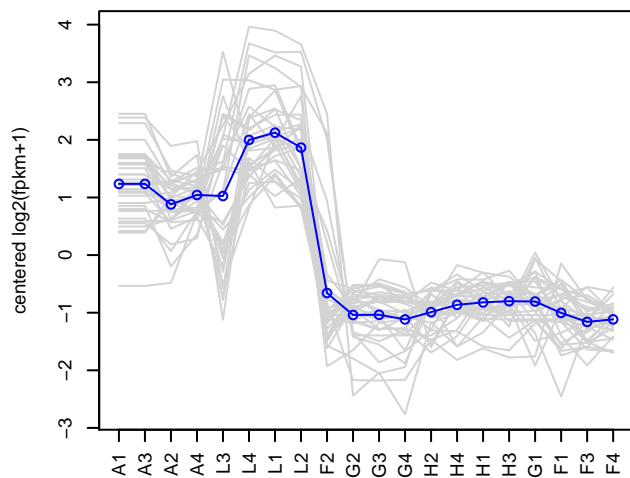

subcluster\_14\_log2\_medianCentered\_fpkm.matrix, 129 tra

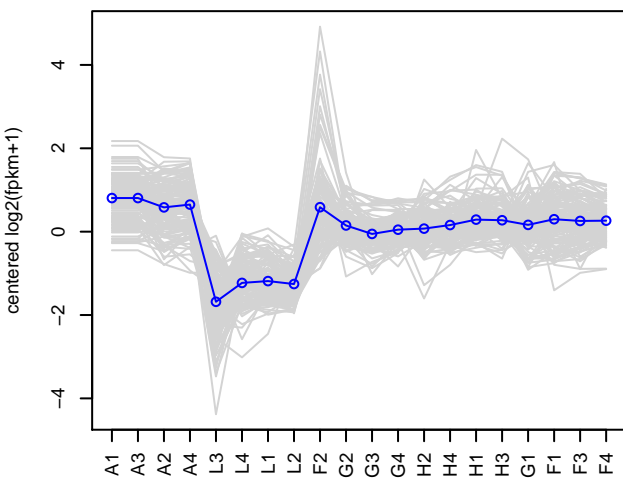

subcluster\_15\_log2\_medianCentered\_fpkm.matrix, 10 tra

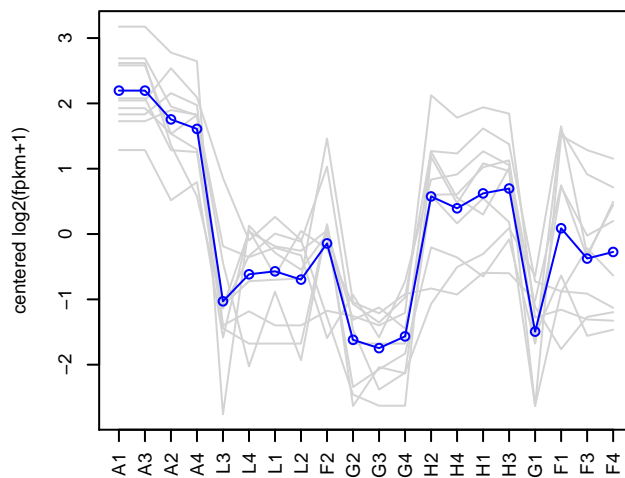

subcluster\_16\_log2\_medianCentered\_fpkm.matrix, 11 tra

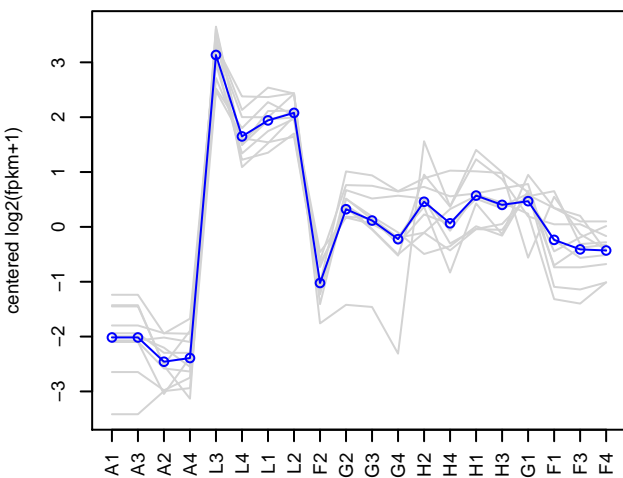

subcluster\_17\_log2\_medianCentered\_fpkm.matrix, 27 tra

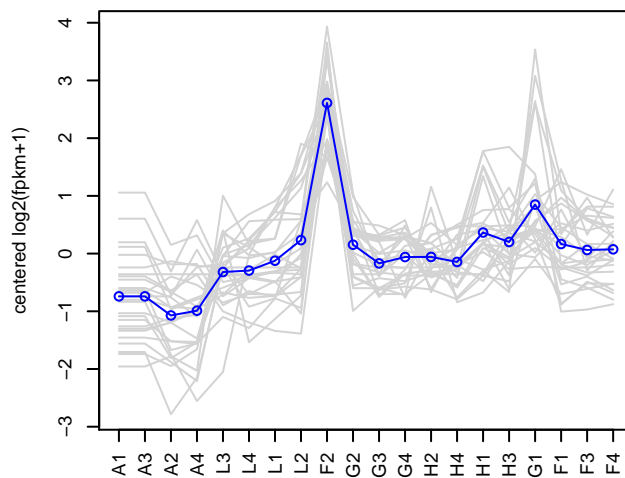

subcluster\_18\_log2\_medianCentered\_fpkm.matrix, 10 tra subcluster\_19\_log2\_medianCentered\_fpkm.matrix, 15 tra

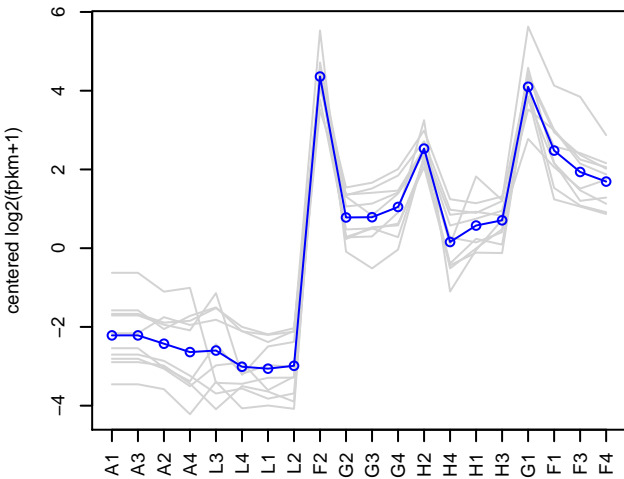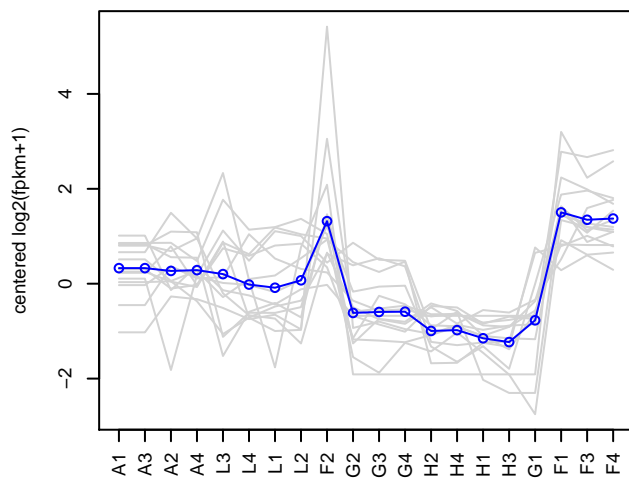

subcluster\_1\_log2\_medianCentered\_fpkm.matrix, 252 tra subcluster\_20\_log2\_medianCentered\_fpkm.matrix, 6 tra

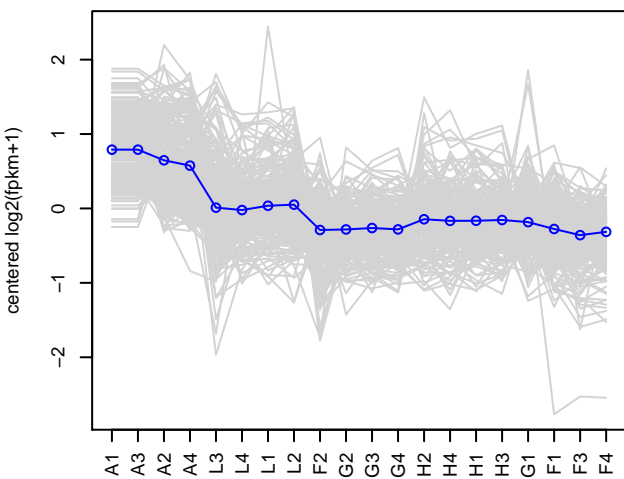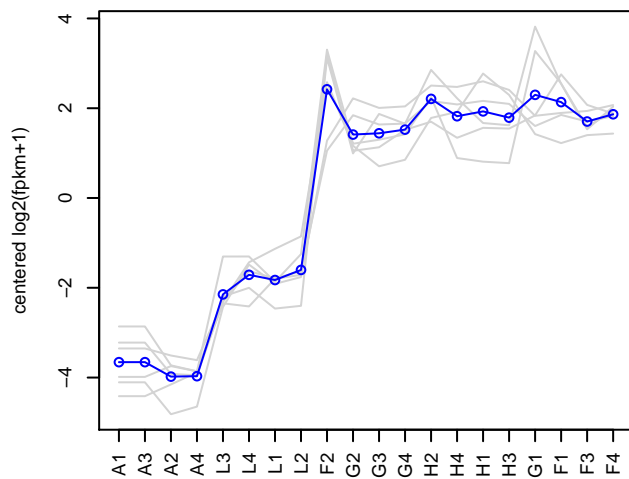

subcluster\_21\_log2\_medianCentered\_fpk.matrix, 10 tra subcluster\_22\_log2\_medianCentered\_fpk.matrix, 20 tra

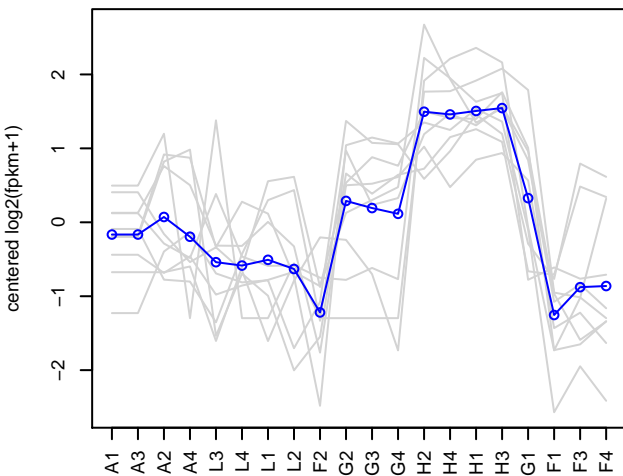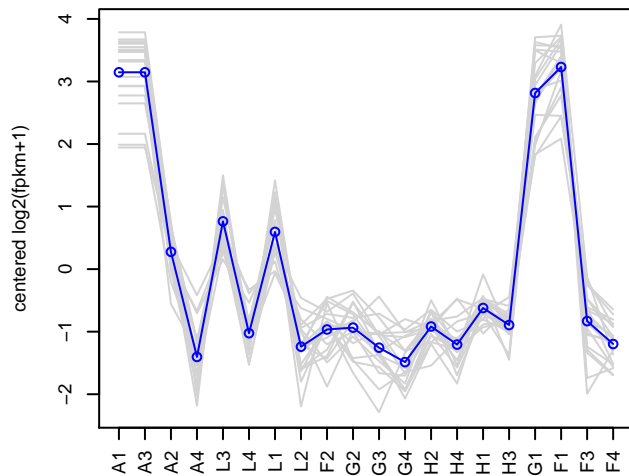

subcluster\_23\_log2\_medianCentered\_fpk.matrix, 17 tra subcluster\_24\_log2\_medianCentered\_fpk.matrix, 7 tra

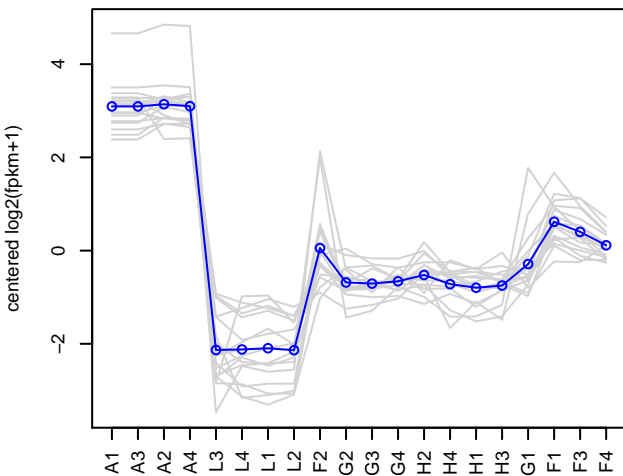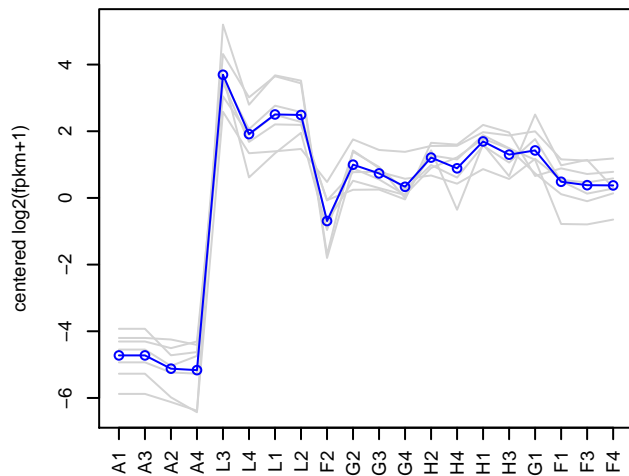

subcluster\_25\_log2\_medianCentered\_fpkm.matrix, 33 tra

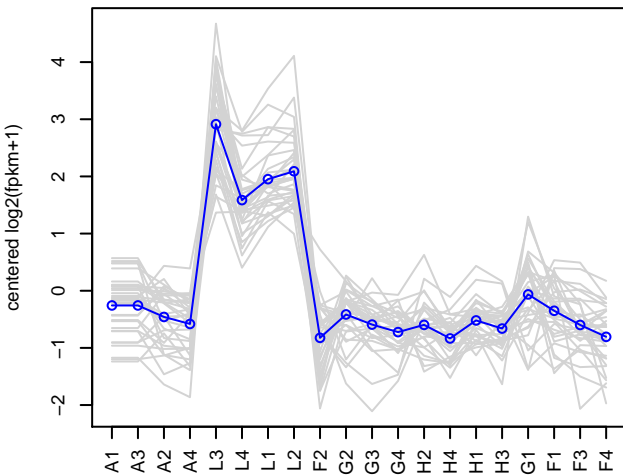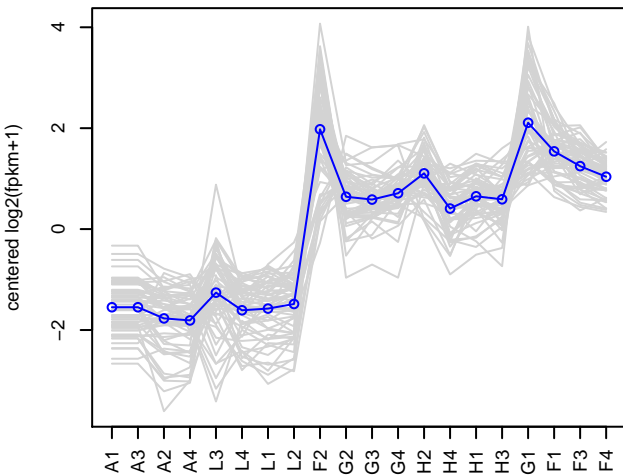

subcluster\_27\_log2\_medianCentered\_fpkm.matrix, 14 tra

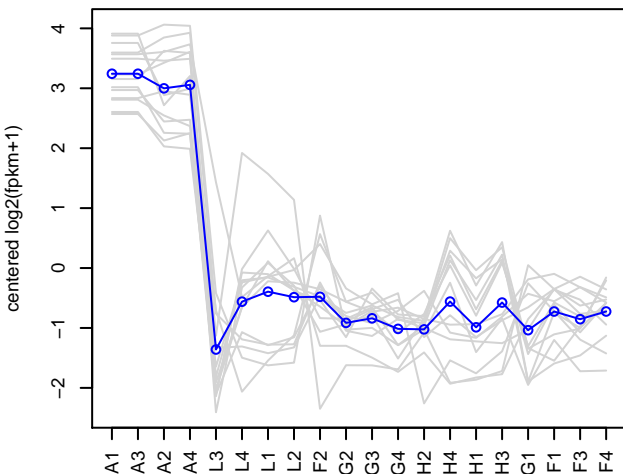

subcluster\_28\_log2\_medianCentered\_fpkm.matrix, 3 tra

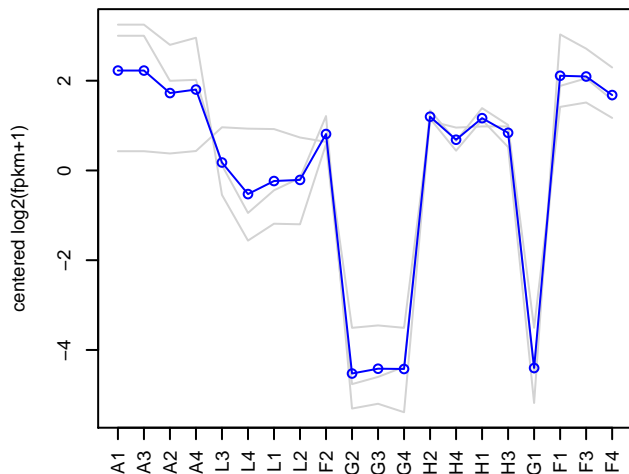

subcluster\_29\_log2\_medianCentered\_fpk.m.matrix, 1 trar subcluster\_2\_log2\_medianCentered\_fpk.m.matrix, 379 tra

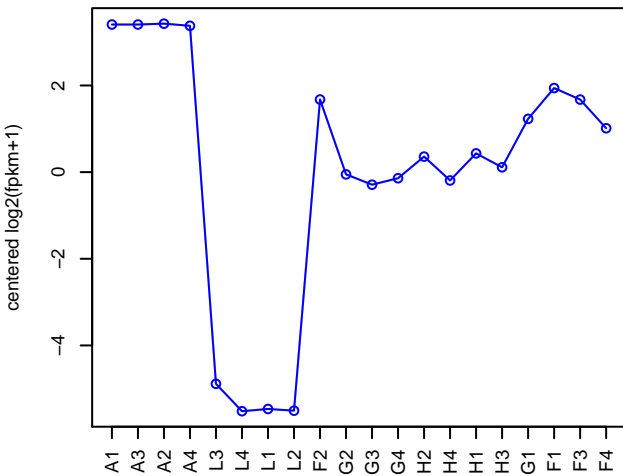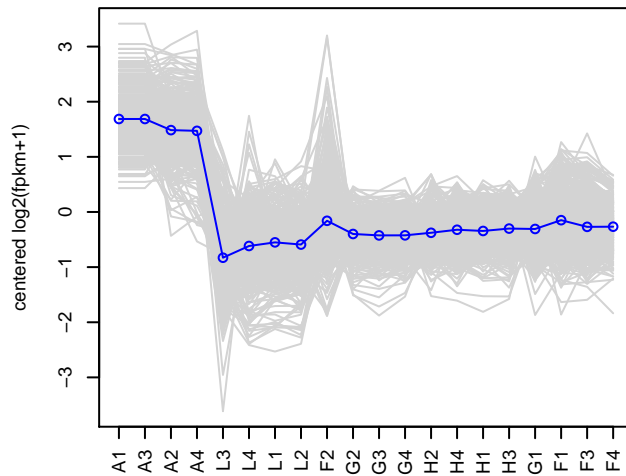

subcluster\_30\_log2\_medianCentered\_fpk.m.matrix, 2 trar subcluster\_31\_log2\_medianCentered\_fpk.m.matrix, 1 trar

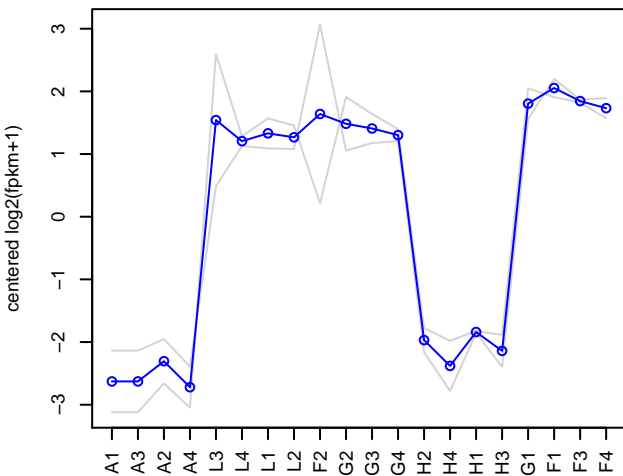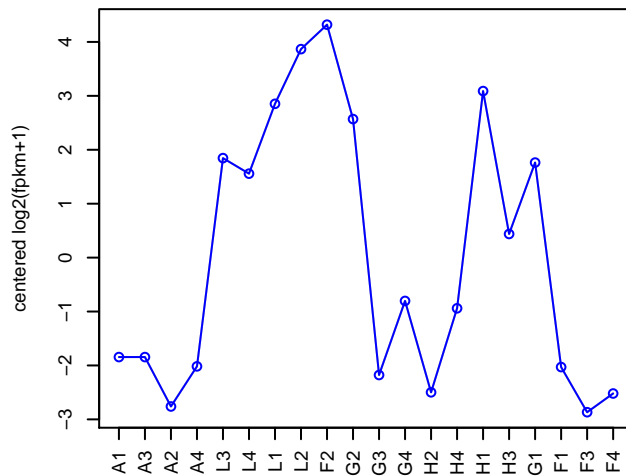

subcluster\_32\_log2\_medianCentered\_fpkm.matrix, 1 trar subcluster\_3\_log2\_medianCentered\_fpkm.matrix, 300 tra

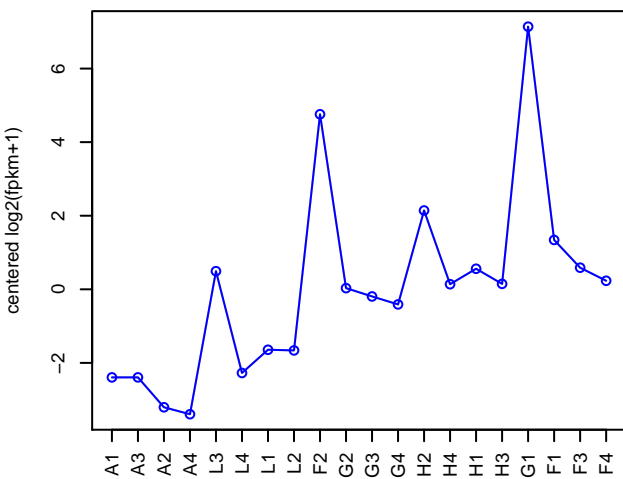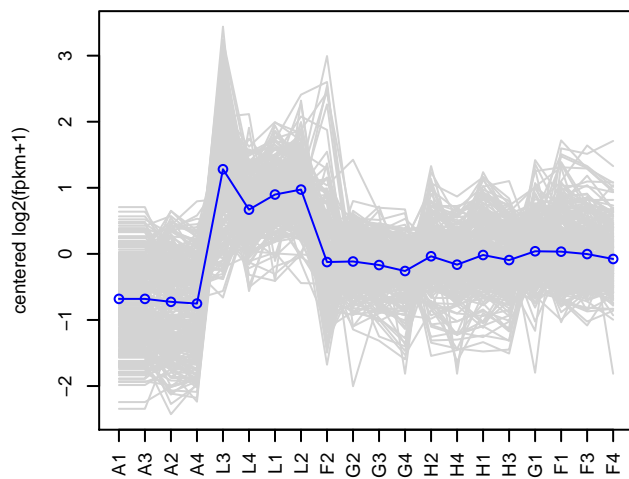

subcluster\_4\_log2\_medianCentered\_fpkm.matrix, 171 tra subcluster\_5\_log2\_medianCentered\_fpkm.matrix, 38 tra

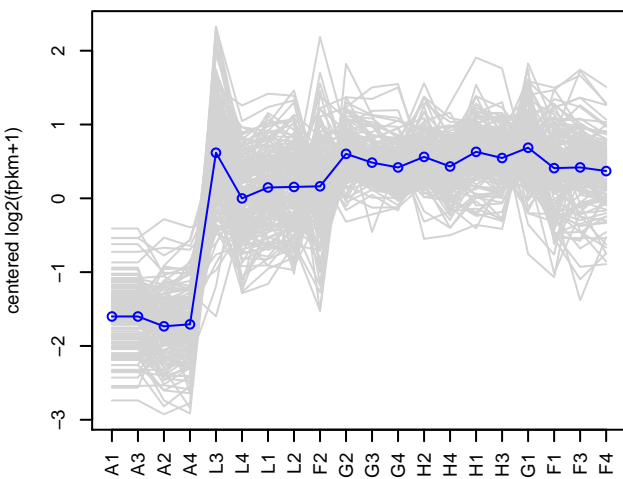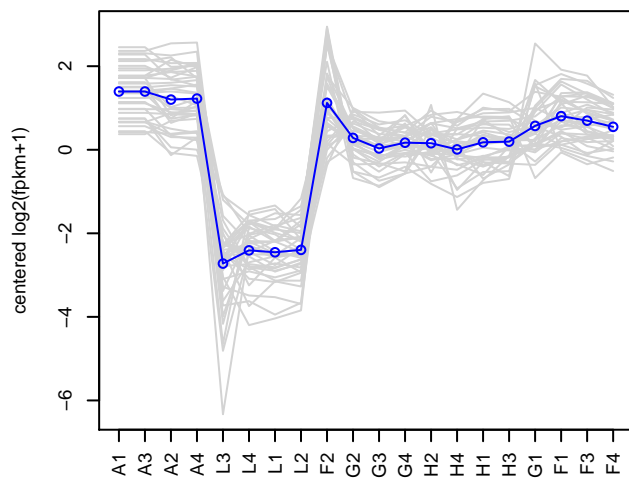

subcluster\_6\_log2\_medianCentered\_fpkm.matrix, 308 tra

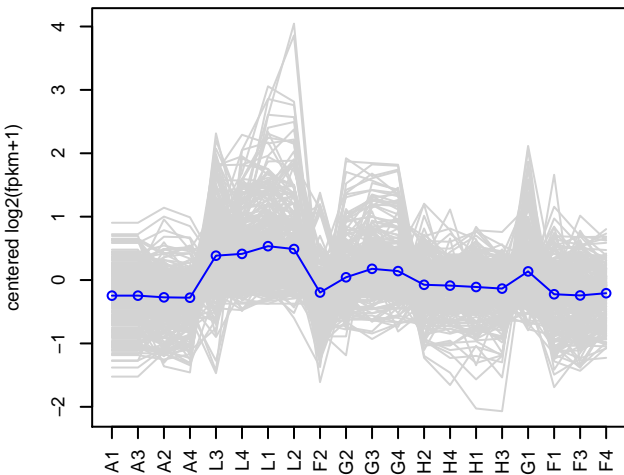

subcluster\_7\_log2\_medianCentered\_fpkm.matrix, 50 tra

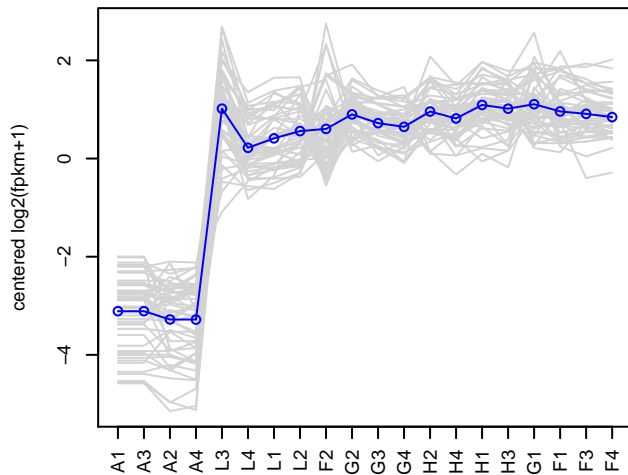

subcluster\_8\_log2\_medianCentered\_fpkm.matrix, 81 tra

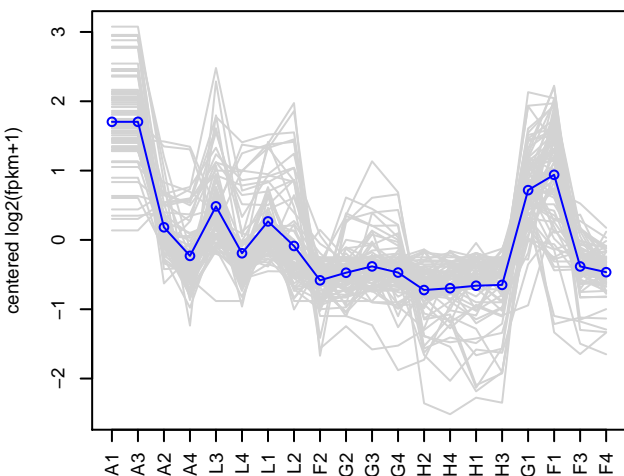

subcluster\_9\_log2\_medianCentered\_fpkm.matrix, 267 tra

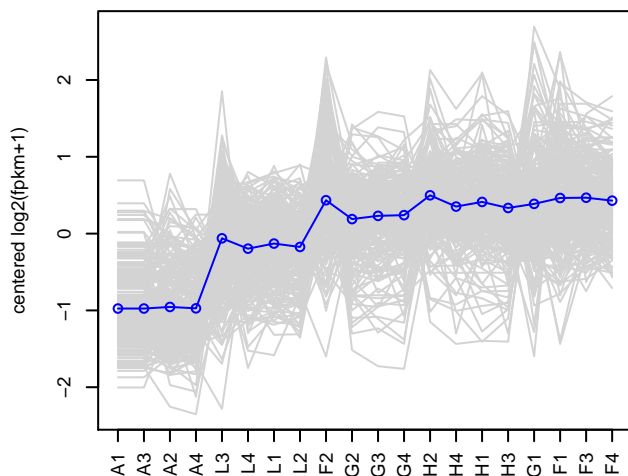

Supplement: 12870_2016_938_MOESM3_ESM.pdf [file 12870_2016_938_MOESM3_ESM.pdf]
