# Supplementary material for: Analysis of transcriptional response to heat stress in Rhazya stricta
Source: PubMed Central journal article supplement (PMC5109689; doi:10.1186/s12870-016-0938-6), 2016-11-14

subcluster\_10\_log2\_medianCentered\_fpkm.matrix, 178 tra subcluster\_11\_log2\_medianCentered\_fpkm.matrix, 108 tra

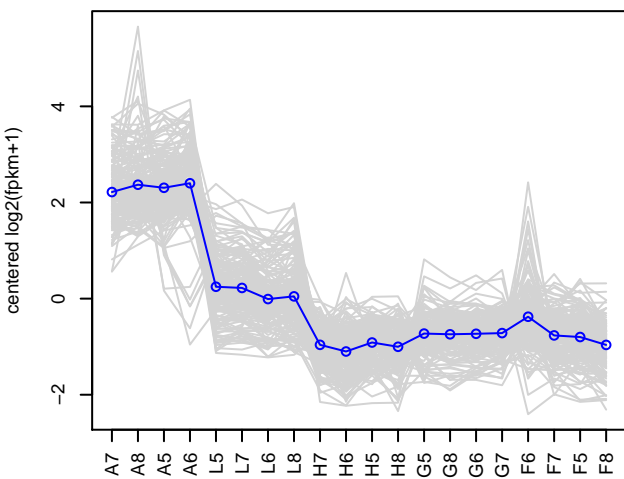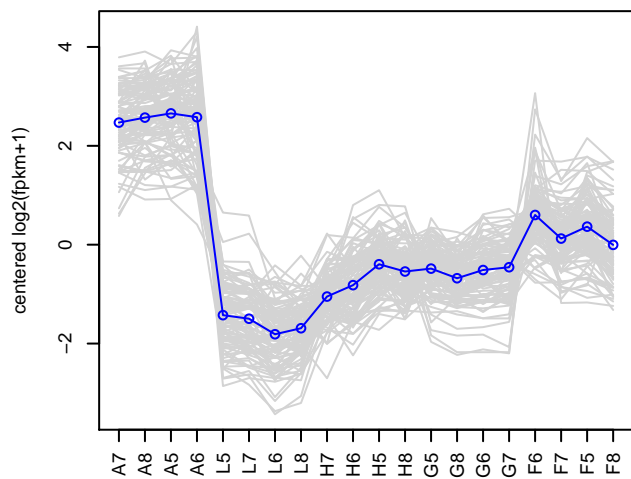

subcluster\_12\_log2\_medianCentered\_fpkm.matrix, 87 tra subcluster\_13\_log2\_medianCentered\_fpkm.matrix, 17 tra

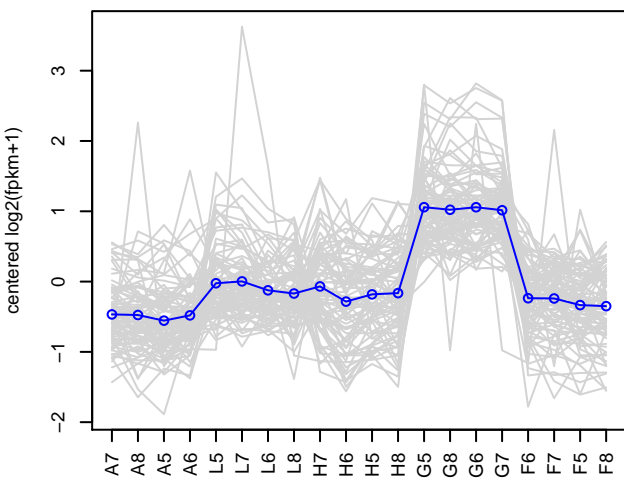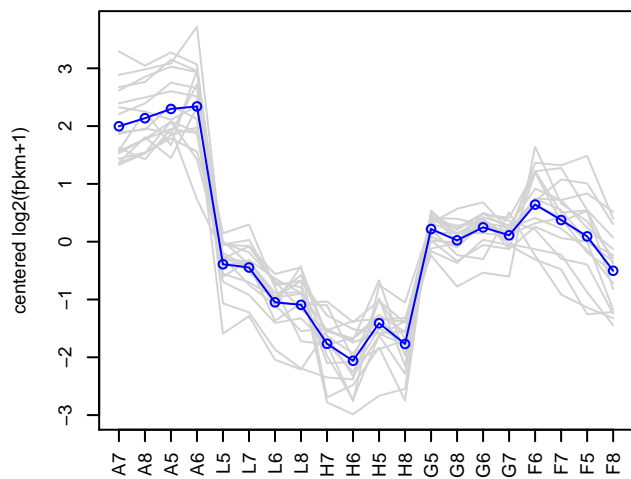

subcluster\_14\_log2\_medianCentered\_fpk.matrix, 28 tra subcluster\_15\_log2\_medianCentered\_fpk.matrix, 42 tra

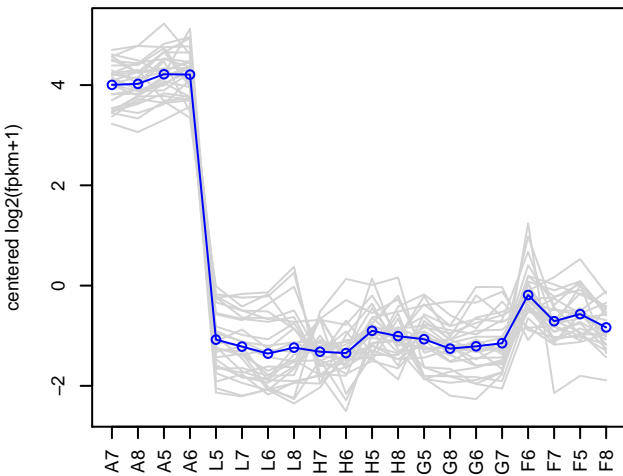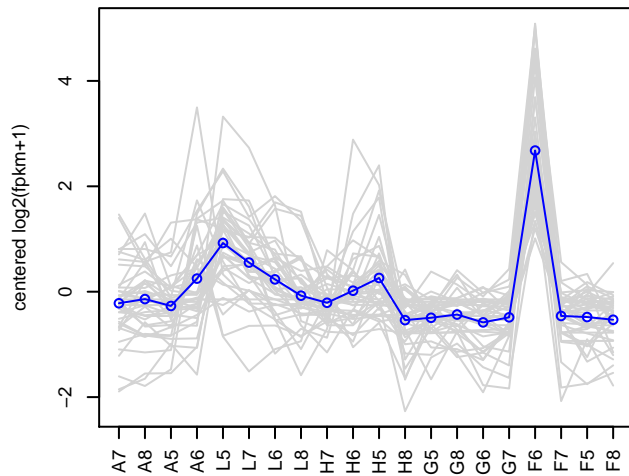

subcluster\_16\_log2\_medianCentered\_fpk.matrix, 94 tra subcluster\_17\_log2\_medianCentered\_fpk.matrix, 76 tra

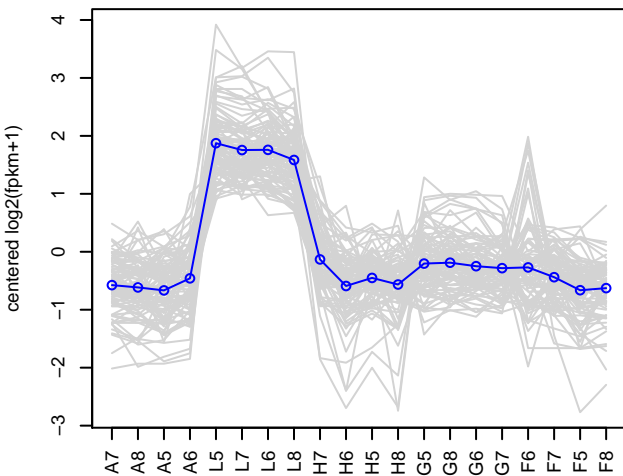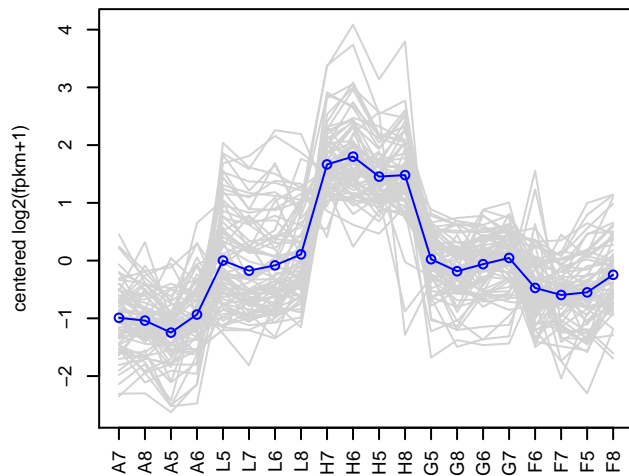

subcluster\_18\_log2\_medianCentered\_fpk.matrix, 91 tra subcluster\_19\_log2\_medianCentered\_fpk.matrix, 14 tra

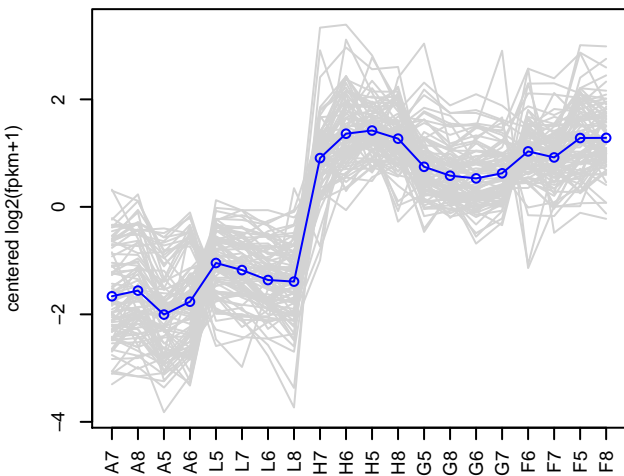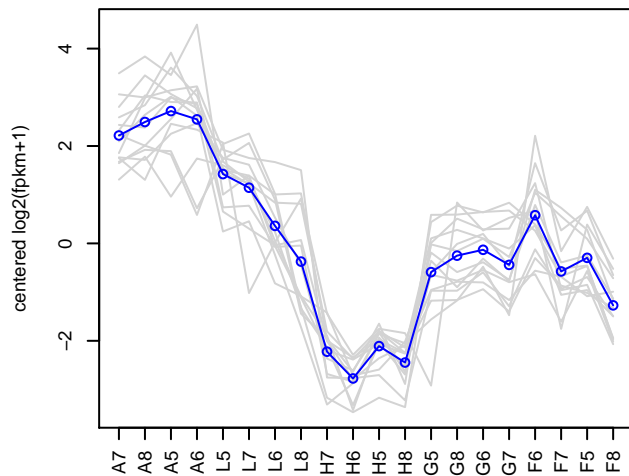

subcluster\_1\_log2\_medianCentered\_fpk.matrix, 27 tra subcluster\_20\_log2\_medianCentered\_fpk.matrix, 33 tra

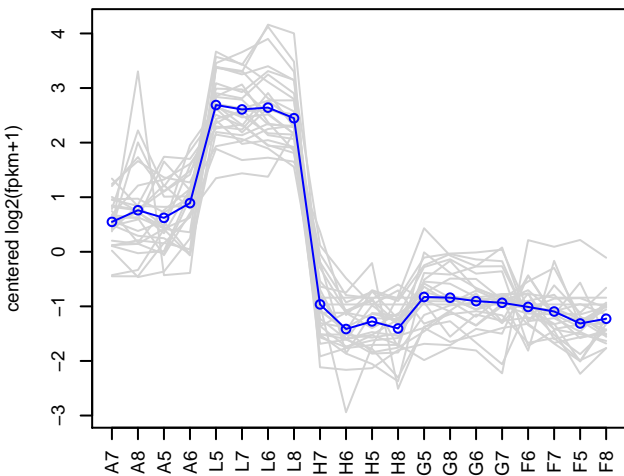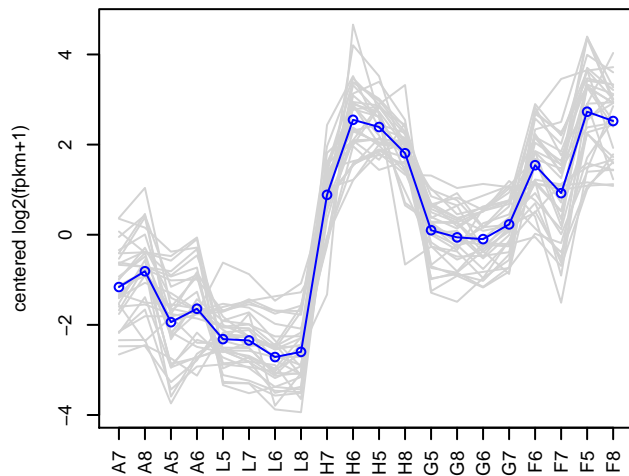

subcluster\_21\_log2\_medianCentered\_fpk.matrix, 7 trar subcluster\_22\_log2\_medianCentered\_fpk.matrix, 18 trar

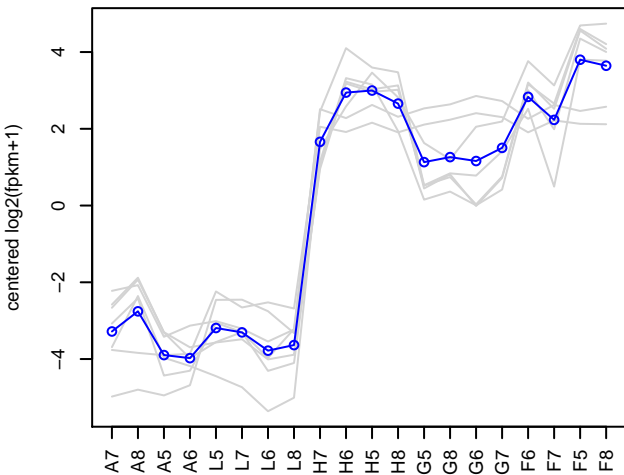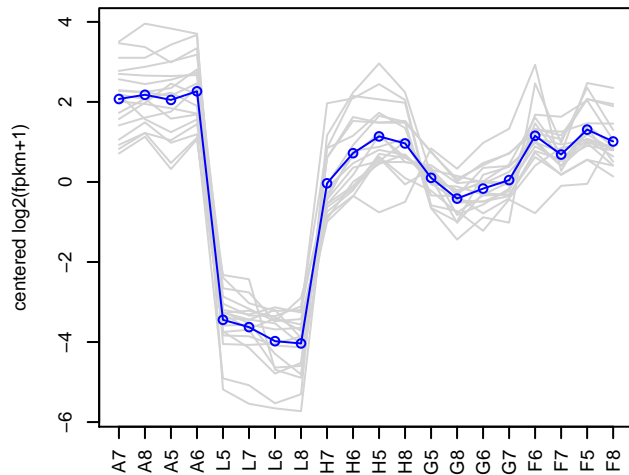

subcluster\_23\_log2\_medianCentered\_fpk.matrix, 2 trar subcluster\_24\_log2\_medianCentered\_fpk.matrix, 6 trar

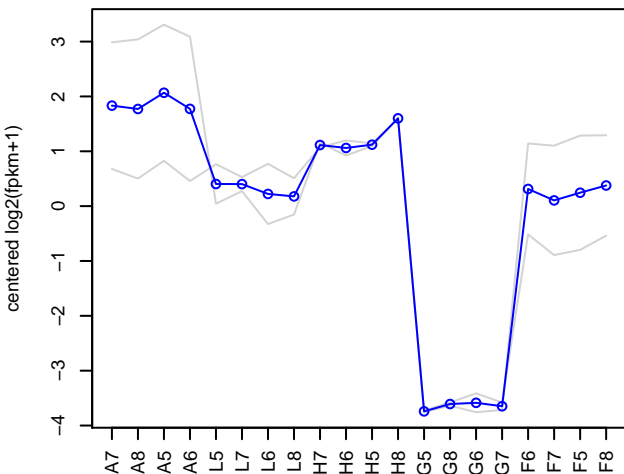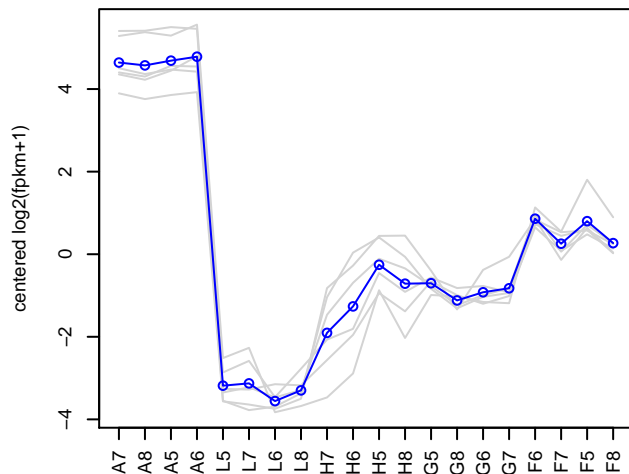

subcluster\_25\_log2\_medianCentered\_fpkkm.matrix, 19 tra

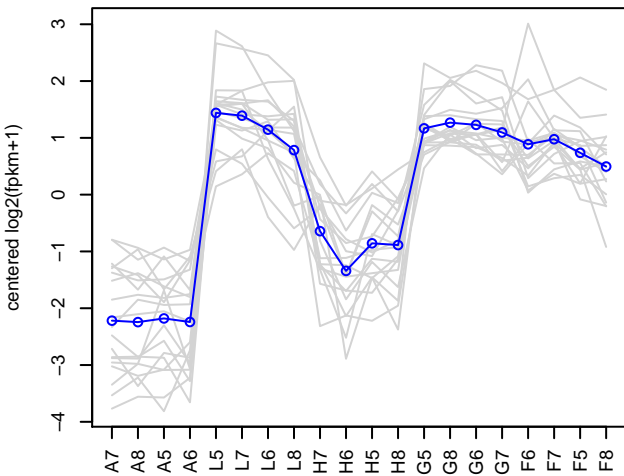

subcluster\_26\_log2\_medianCentered\_fpkkm.matrix, 47 tra

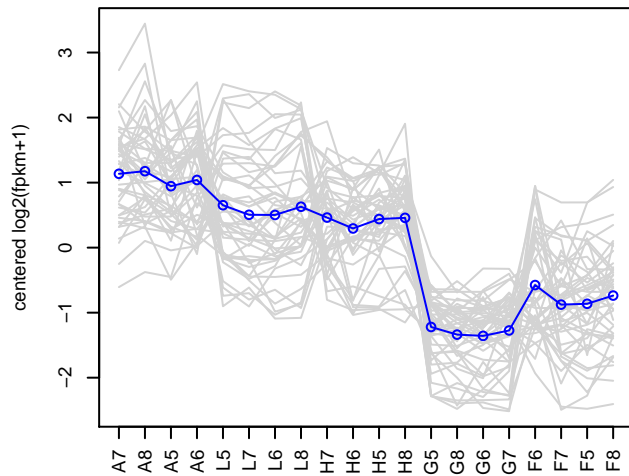

subcluster\_27\_log2\_medianCentered\_fpkkm.matrix, 30 tra

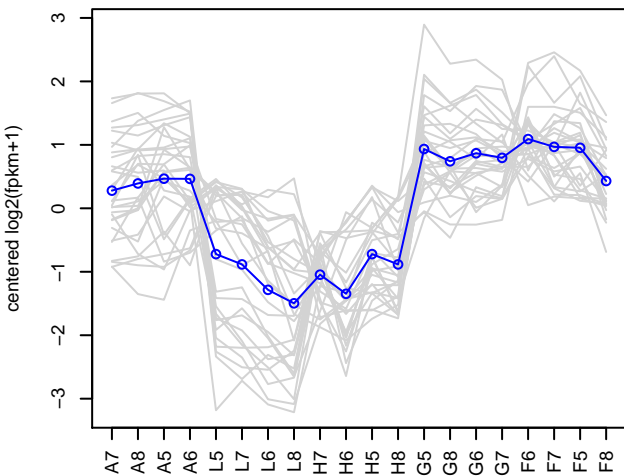

subcluster\_28\_log2\_medianCentered\_fpkkm.matrix, 13 tra

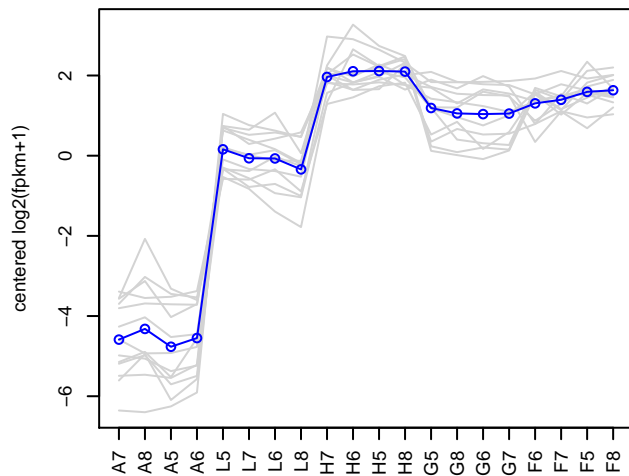

subcluster\_29\_log2\_medianCentered\_fpk.matrix, 6 trar subcluster\_2\_log2\_medianCentered\_fpk.matrix, 800 tra

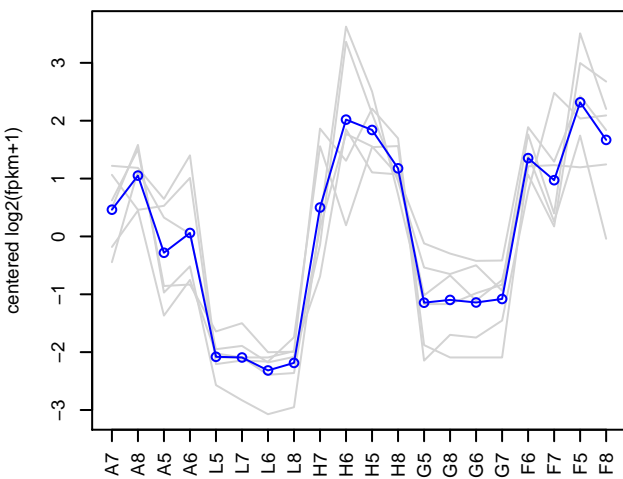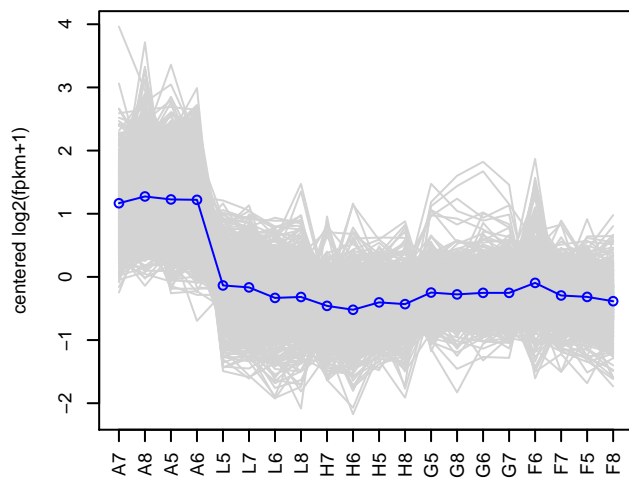

subcluster\_30\_log2\_medianCentered\_fpk.matrix, 12 tra subcluster\_31\_log2\_medianCentered\_fpk.matrix, 4 tra

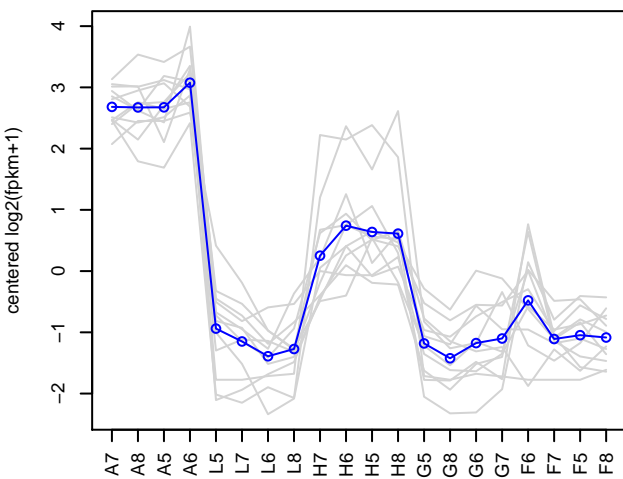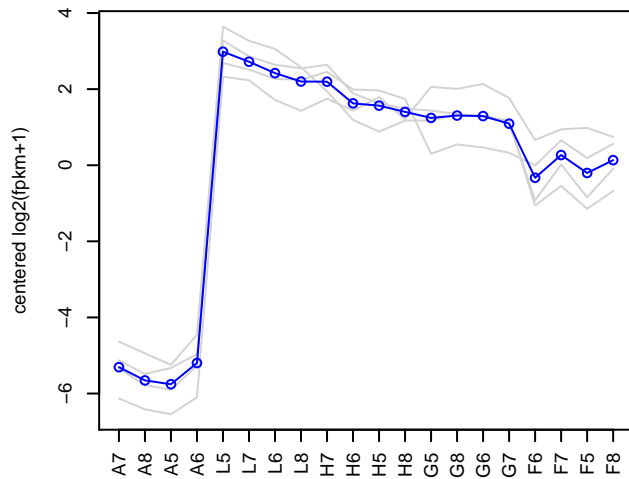

subcluster\_32\_log2\_medianCentered\_fpk.m.matrix, 4 trar

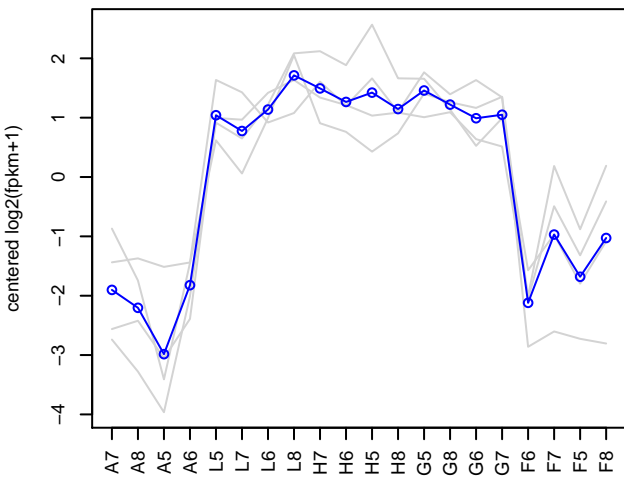

subcluster\_33\_log2\_medianCentered\_fpk.m.matrix, 1 trar

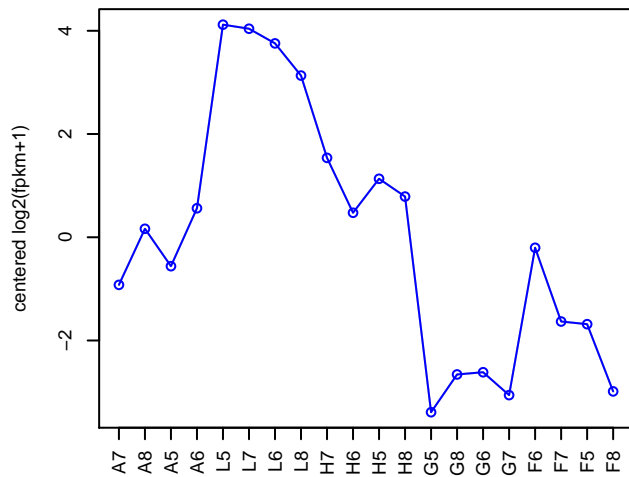

subcluster\_34\_log2\_medianCentered\_fpk.m.matrix, 7 trar

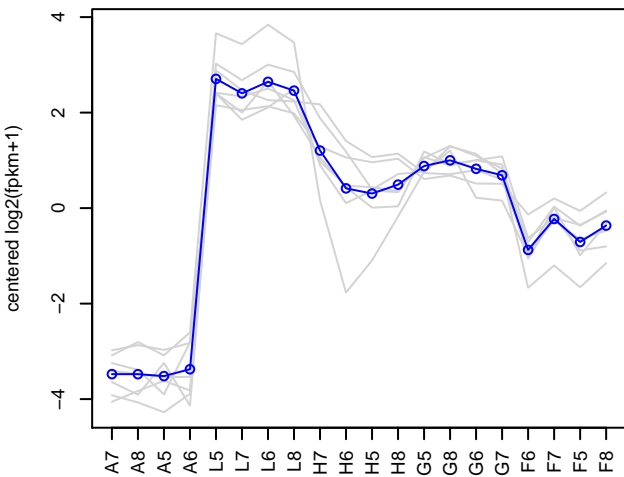

subcluster\_35\_log2\_medianCentered\_fpk.m.matrix, 4 trar

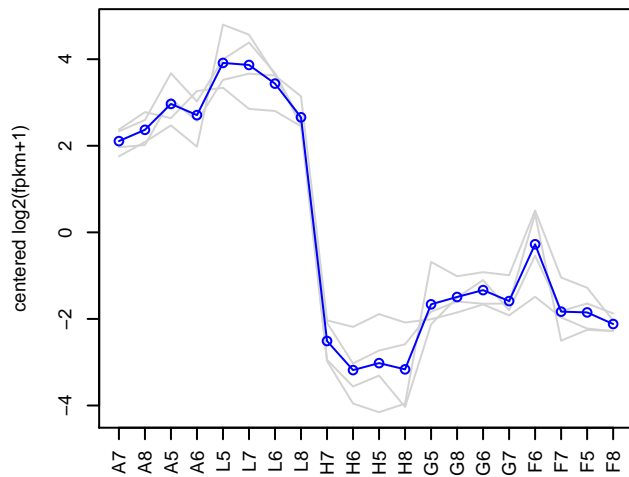

subcluster\_36\_log2\_medianCentered\_fpk.m.matrix, 2 trar

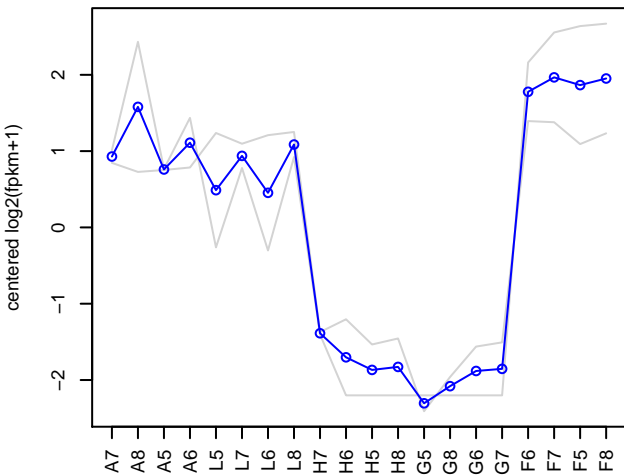

subcluster\_37\_log2\_medianCentered\_fpk.m.matrix, 2 trar

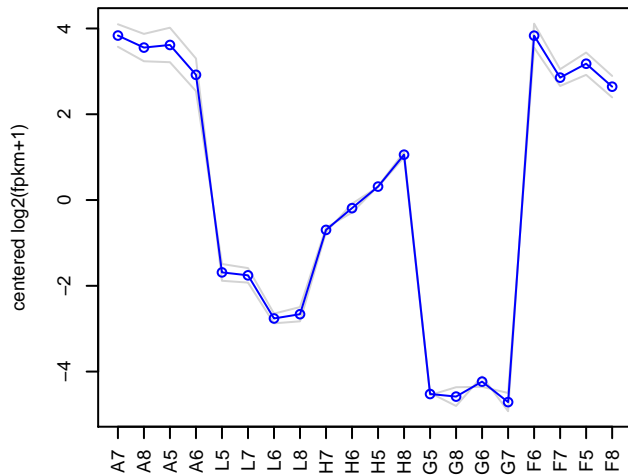

subcluster\_38\_log2\_medianCentered\_fpk.m.matrix, 3 trar

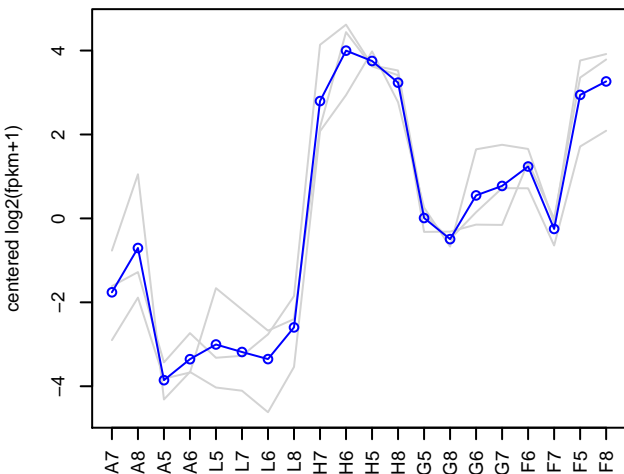

subcluster\_3\_log2\_medianCentered\_fpk.m.matrix, 334 trar

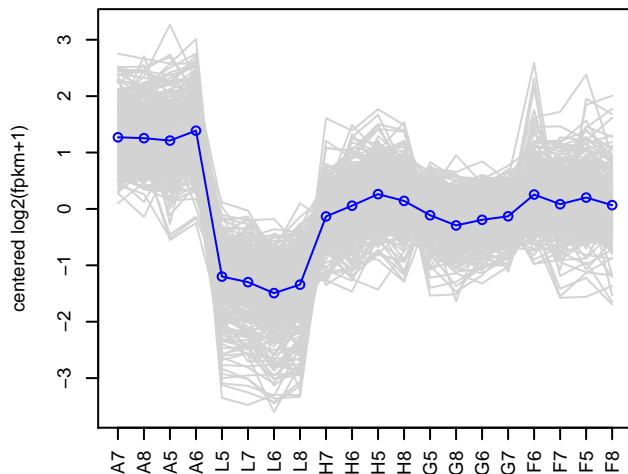



subcluster\_4\_log2\_medianCentered\_fpkm.matrix, 886 tra

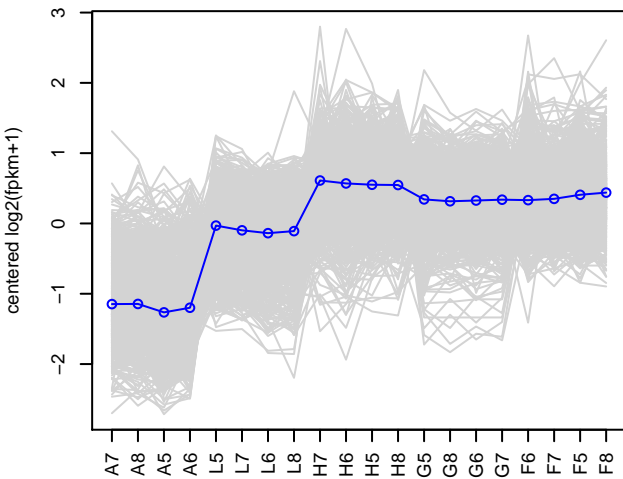

subcluster\_5\_log2\_medianCentered\_fpkm.matrix, 878 tra

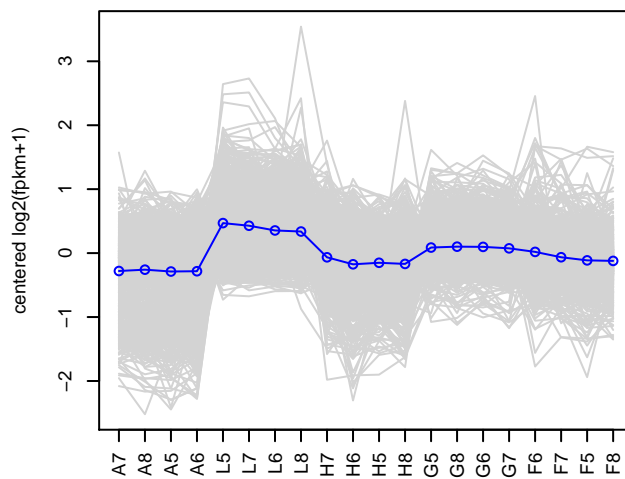

subcluster\_6\_log2\_medianCentered\_fpkm.matrix, 495 tra

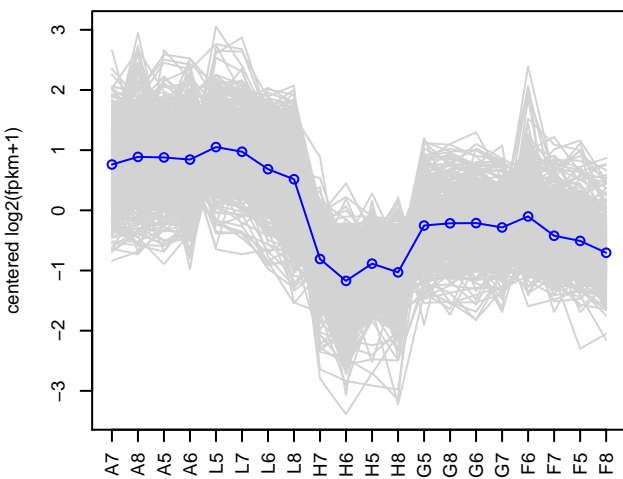

subcluster\_7\_log2\_medianCentered\_fpkm.matrix, 175 tra

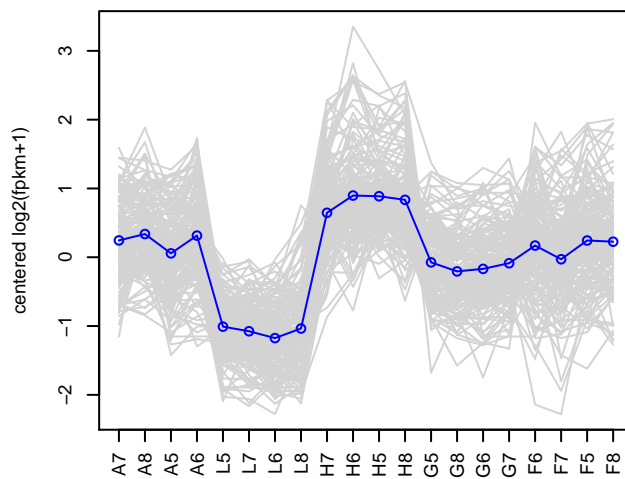

subcluster\_8\_log2\_medianCentered\_fpkm.matrix, 288 tra

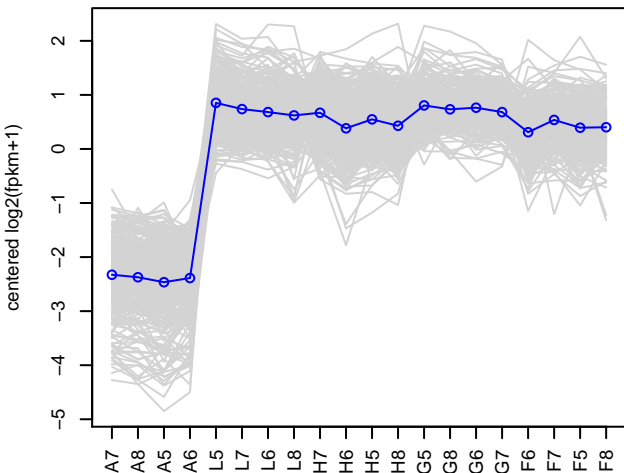

subcluster\_9\_log2\_medianCentered\_fpkm.matrix, 15 tra

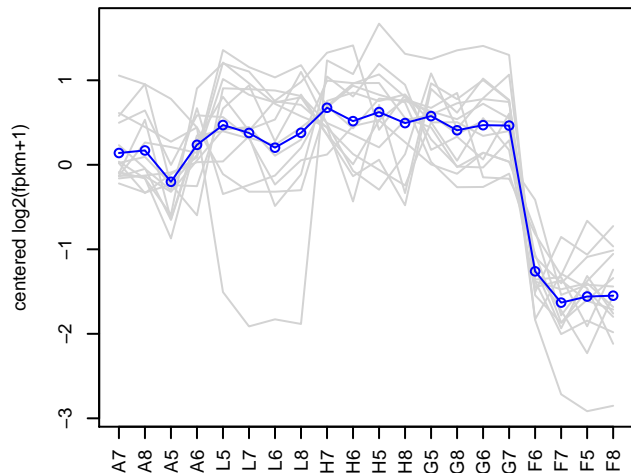

Supplement: 12870_2016_938_MOESM4_ESM.pdf [file 12870_2016_938_MOESM4_ESM.pdf]
